# Supplementary material for: Accuracy of structure-based sequence alignment of automatic methods
Source: PubMed Central journal article supplement (PMC2039753; doi:10.1186/1471-2105-8-355), 2007-09-20

**A**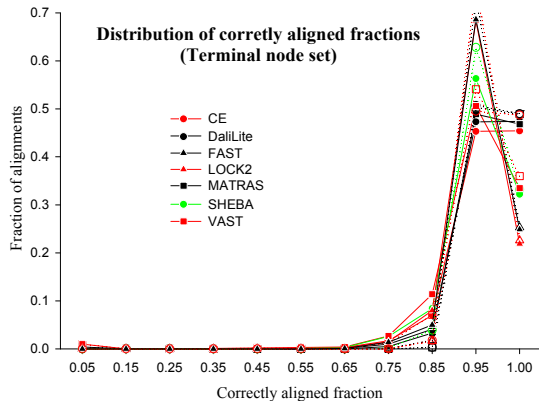**B**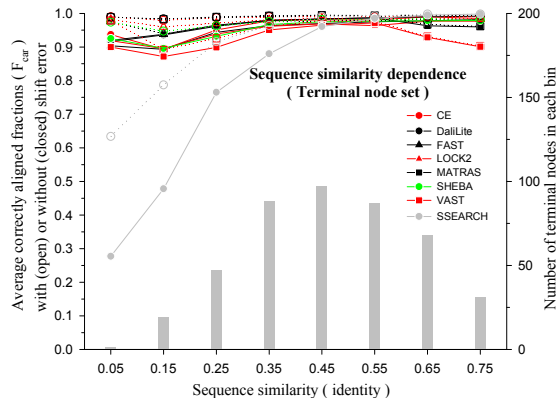**C**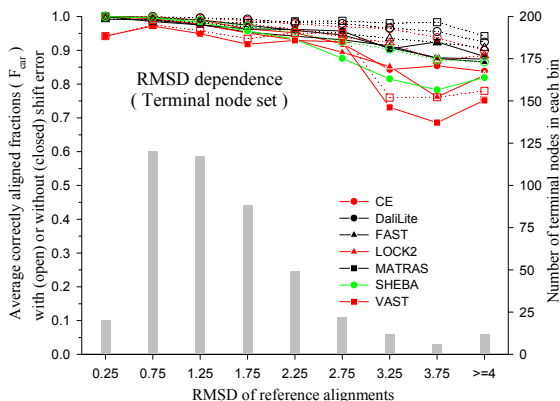**D**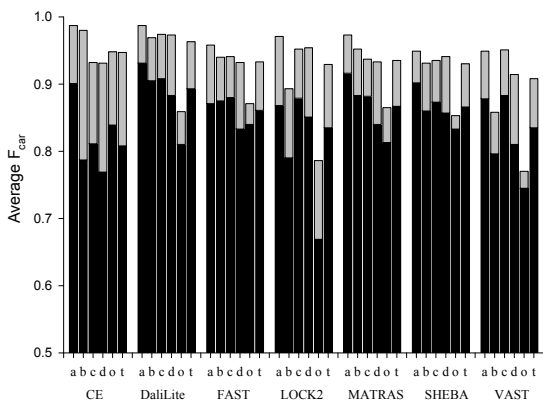

Supplement: 1471-2105-8-355-S1.pdf [file 1471-2105-8-355-S1.pdf]
