# Supplementary material for: Accuracy of structure-based sequence alignment of automatic methods
Source: PubMed Central journal article supplement (PMC2039753; doi:10.1186/1471-2105-8-355), 2007-09-20
Supplement: 1471-2105-8-355-S2.pdf [file 1471-2105-8-355-S2.pdf]

# The number of times when a method was the best or in the best class or when it failed<sup>a</sup>

| <b>f(0) including immunoglobulins</b> |                         |                        |                      | <b>f(8) including immunoglobulins</b> |            |             |         |
|---------------------------------------|-------------------------|------------------------|----------------------|---------------------------------------|------------|-------------|---------|
| Method <sup>b</sup>                   | Unique top <sup>c</sup> | Top Class <sup>d</sup> | Failure <sup>e</sup> | Method                                | Unique top | Top Class   | Failure |
| ce                                    | 169                     | 1869                   | 828                  | ce                                    | 282        | 3354        | 152     |
| da                                    | <i>440</i>              | <i>3348</i>            | <i>126</i>           | da                                    | 187        | <i>3542</i> | 27      |
| fa                                    | 123                     | 2733                   | 252                  | fa                                    | 18         | 3057        | 32      |
| lo                                    | 51                      | 2641                   | 488                  | lo                                    | 5          | 3316        | 47      |
| ma                                    | 283                     | 2966                   | 346                  | ma                                    | 258        | 3399        | 94      |
| sn                                    | 81                      | 2658                   | 414                  | sn                                    | 27         | 3067        | 62      |
| va                                    | 120                     | 2179                   | 201                  | va                                    | 139        | 2795        | 73      |
| <b>f(0) without immunoglobulins</b>   |                         |                        |                      | <b>f(8) without immunoglobulins</b>   |            |             |         |
| ce                                    | 157                     | 1435                   | 282                  | ce                                    | 239        | 1944        | 149     |
| da                                    | <i>234</i>              | <i>2048</i>            | <i>41</i>            | da                                    | 172        | <i>2119</i> | 27      |
| fa                                    | 96                      | 1805                   | 48                   | fa                                    | 12         | 1935        | 23      |
| lo                                    | 32                      | 1768                   | 91                   | lo                                    | 5          | 2066        | 28      |
| ma                                    | 194                     | 1884                   | 108                  | ma                                    | 201        | 1989        | 90      |
| sn                                    | 65                      | 1798                   | 79                   | sn                                    | 26         | 1892        | 36      |
| va                                    | 99                      | 1536                   | 87                   | va                                    | 137        | 1834        | 68      |

<sup>a</sup>The best number in each category is italicized. All methods achieved less than 0.5 of  $f_{\text{car}}(0)$ , for 15 pairs from cd00096 and 2 pairs from cd00105. For only one pair from cd00105,  $f_{\text{car}}(8)$  values of all methods are less than 0.5, probably because one of the structure has relatively large fraction of coordinate-missing residues and the structures are small. The five outlier superfamilies from Figure 11 were excluded, leaving 3591 pairs in total.

<sup>b</sup>The method is indicated by the first two letters of its name.

<sup>c</sup>The score of the second best method is lower than that of the best one by at least 0.1

<sup>d</sup>The score difference of each method from the best one is 0.1 or less.

<sup>e</sup>The score of the method is 0.5 or less.
